# Supplementary material for: Estimating the annual dengue force of infection from the age of reporting primary infections across urban centres in endemic countries
Source: Springer Nature journal article supplement (doi:10.1186/s12916-021-02101-6), 2021-09-30

## S2 File: Population demographics of the study-participating cities

Population demographics of the 13 study participating cities in the Philippines according to the 2015 Philippine census. Source: Philippine Statistics Authority (PSA):

| City       | Total Population | Median age | Youth DR (<15 years) | Old age DR (>65 years) | % Annual growth rate (2010-15) |
|------------|------------------|------------|----------------------|------------------------|--------------------------------|
| Baguio     | 345366           | 23.77      | 47.21                | 6.13                   | 1.54                           |
| Cotabato   | 299438           | 21.88      | 55.62                | 4.54                   | 1.86                           |
| Davao      | 1632991          | 24.46      | 46.31                | 6.14                   | 2.3                            |
| Iliolo     | 447992           | 27.08      | 39.38                | 8.36                   | 1.03                           |
| Manila     | 1780148          | 25.37      | 42.34                | 5.96                   | 1.43                           |
| Muntinlupa | 504509           | 27.68      | 36.47                | 5.44                   | 1.78                           |
| Naga       | 196003           | 24.14      | 47.16                | 7.22                   | 2.19                           |
| Quezon     | 2936116          | 26.39      | 38.1                 | 5.75                   | 1.17                           |
| Surigao    | 154137           | 23.91      | 48.39                | 7.76                   | 1.77                           |
| Tacloban   | 242089           | 23.29      | 48.41                | 6.5                    | 1.74                           |
| Tuguegarao | 153502           | 26.2       | 37.1                 | 7.19                   | 1.93                           |
| Valenzuela | 620422           | 26.09      | 40.37                | 5.00                   | 1.45                           |
| Zamboanga  | 861799           | 23.26      | 50.98                | 6.07                   | 1.26                           |

Population age structure of the 13 study-participating cities in the Philippines according to the 2015 Philippine census:

| City       | Age (years) |        |        |        |        |        |        |        |        | Total   |
|------------|-------------|--------|--------|--------|--------|--------|--------|--------|--------|---------|
|            | 0-4         | 5-9    | 10-14  | 15-19  | 20-24  | 25-29  | 30-34  | 35-39  | >40    |         |
| Baguio     | 37367       | 34588  | 34176  | 36577  | 36879  | 29876  | 25567  | 22021  | 88315  | 345366  |
| Cotabato   | 34262       | 35300  | 34431  | 34767  | 29076  | 24432  | 20446  | 20994  | 65730  | 299438  |
| Davao      | 168380      | 166402 | 161276 | 169826 | 168678 | 150876 | 126378 | 112341 | 408834 | 1632991 |
| Iliolo     | 41946       | 39230  | 38238  | 43482  | 44468  | 40014  | 35486  | 31488  | 133640 | 447992  |
| Manila     | 186656      | 164283 | 157333 | 177571 | 191512 | 170895 | 144641 | 123318 | 463939 | 1780148 |
| Muntinlupa | 44696       | 43068  | 41881  | 45804  | 50144  | 49807  | 50636  | 37706  | 140767 | 504509  |
| Naga       | 19474       | 20245  | 20000  | 21889  | 18866  | 15908  | 14050  | 13085  | 49176  | 196003  |
| Quezon     | 260324      | 259425 | 257923 | 296534 | 315065 | 282540 | 245160 | 219197 | 799948 | 2936116 |
| Surigao    | 15974       | 15667  | 16123  | 17482  | 15107  | 12563  | 10534  | 9630   | 41057  | 154137  |
| Tacloban   | 26425       | 24713  | 24517  | 28507  | 25677  | 20350  | 17469  | 14890  | 59541  | 242089  |
| Tuguegarao | 13462       | 13267  | 12739  | 18100  | 15949  | 13433  | 11730  | 10733  | 44089  | 153502  |
| Valenzuela | 55921       | 58939  | 57429  | 60771  | 63791  | 61439  | 54456  | 49424  | 158252 | 620422  |
| Zamboanga  | 95988       | 93276  | 90500  | 94716  | 86578  | 70718  | 60836  | 57067  | 212120 | 861799  |

Percentage population age structure of the 13 study-participating cities in the Philippines according to the 2015 Philippine census:

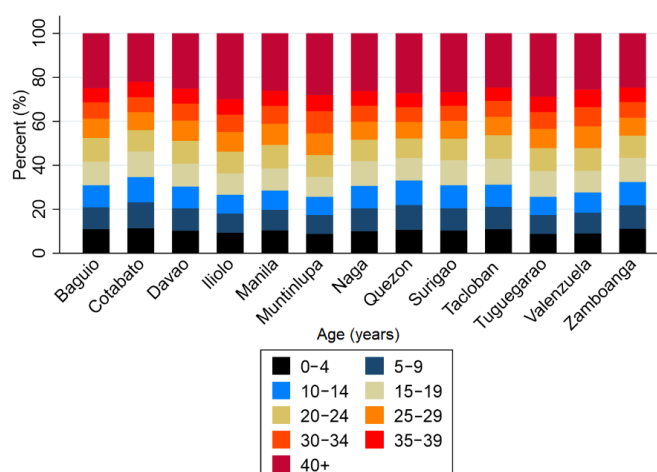

Supplement: MOESM2 [file 19716248]
