# Supplementary material for: Estimating the annual dengue force of infection from the age of reporting primary infections across urban centres in endemic countries
Source: Springer Nature journal article supplement (doi:10.1186/s12916-021-02101-6), 2021-09-30

| City       | Predicted annual attack rate <sup>*a</sup> |                  |                  |                  |                  |                  | Attack rate (AR)  |
|------------|--------------------------------------------|------------------|------------------|------------------|------------------|------------------|-------------------|
|            | 2014                                       | 2015             | 2016             | 2017             | 2018             | 2014-18 average  | (catalytic model) |
|            | AR [95%CI]                                 | AR [95%CI]       | AR [95%CI]       | AR [95%CI]       | AR [95%CI]       | AR [95%CI]       | AR [95%CI]        |
| Tuguegarao | 0.19 [0.13-0.26]                           | 0.13 [0.12-0.15] | 0.17 [0.14-0.22] | 0.18 [0.16-0.22] | 0.10 [0.09-0.12] | 0.12 [0.11-0.13] | 0.06 [0.04-0.10]  |
| Baguio     | 0.08 [0.06-0.10]                           | 0.04 [0.04-0.05] | 0.05 [0.04-0.05] | 0.06 [0.05-0.08] | 0.07 [0.06-0.09] | 0.06 [0.05-0.07] | 0.05 [0.03-0.08]  |
| Valenzuela | 0.16 [0.13-0.18]                           | 0.18 [0.16-0.20] | 0.13 [0.10-0.16] | 0.16 [0.14-0.19] | 0.13 [0.11-0.16] | 0.16 [0.14-0.18] | 0.16 [0.13-0.19]  |
| Quezon     | 0.16 [0.13-0.20]                           | 0.19 [0.16-0.22] | 0.13 [0.10-0.16] | 0.22 [0.20-0.24] | 0.21 [0.20-0.23] | 0.21 [0.19-0.22] | 0.22 [0.20-0.24]  |
| Manila     | 0.20 [0.18-0.23]                           | 0.19 [0.17-0.21] | 0.16 [0.14-0.19] | 0.14 [0.12-0.16] | 0.12 [0.11-0.14] | 0.15 [0.14-0.17] | 0.15 [0.14-0.17]  |
| Muntinlupa | 0.16 [0.12-0.21]                           | 0.12 [0.09-0.15] | 0.17 [0.14-0.20] | 0.14 [0.11-0.16] | 0.13 [0.10-0.17] | 0.14 [0.12-0.17] | 0.12 [0.09-0.18]  |
| Naga       | 0.07 [0.06-0.08]                           | 0.08 [0.07-0.10] | 0.09 [0.07-0.11] | 0.10 [0.08-0.12] | 0.15 [0.13-0.18] | 0.10 [0.09-0.11] | 0.06 [0.04-0.09]  |
| Iloilo     | 0.21 [0.18-0.24]                           | 0.19 [0.17-0.22] | 0.16 [0.14-0.18] | 0.24 [0.20-0.28] | 0.12 [0.10-0.15] | 0.17 [0.15-0.19] | 0.12 [0.09-0.16]  |
| Tacloban   | 0.06 [0.04-0.09]                           | 0.13 [0.10-0.18] | 0.18 [0.15-0.20] | 0.18 [0.14-0.22] | 0.16 [0.13-0.20] | 0.17 [0.15-0.20] | 0.11 [0.07-0.18]  |
| Surigao    | 0.16 [0.14-0.20]                           | 0.09 [0.07-0.13] | 0.17 [0.12-0.24] | 0.12 [0.09-0.16] | 0.15 [0.13-0.18] | 0.10 [0.08-0.13] | 0.10 [0.08-0.12]  |
| Davao      | 0.16 [0.14-0.19]                           | 0.13 [0.11-0.16] | 0.14 [0.13-0.16] | 0.12 [0.10-0.14] | 0.17 [0.15-0.20] | 0.13 [0.12-0.15] | 0.16 [0.13-0.18]  |
| Cotabato   | 0.15 [0.12-0.18]                           | 0.11 [0.09-0.13] | 0.17 [0.15-0.20] | 0.10 [0.08-0.12] | 0.15 [0.13-0.17] | 0.13 [0.11-0.14] | 0.15 [0.12-0.18]  |
| Zamboanga  | 0.11 [0.09-0.14]                           | 0.18 [0.15-0.23] | 0.17 [0.14-0.19] | 0.20 [0.17-0.23] | 0.19 [0.16-0.22] | 0.17 [0.15-0.20] | 0.11 [0.05-0.16]  |

\*Attack rate (AR):  $1 - \exp^{-FOI}$

a: Estimated annual attack rate according to mean primary DENV age ( $FOI = 0.023 + 0.630 \times 0.852^x$ )

b: Estimated overall attack rate according to FOI estimated from catalytic model

**Attack rate:**

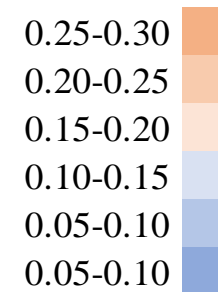

Supplement: MOESM10 [file 19716248]
