# Supplementary material for: Estimating the annual dengue force of infection from the age of reporting primary infections across urban centres in endemic countries
Source: Springer Nature journal article supplement (doi:10.1186/s12916-021-02101-6), 2021-09-30
Supplement: MOESM1 [file 19716248]

| Island Region | City       | DRU                                      | Annual serum samples collected (n) |      |      |      |      | Total |
|---------------|------------|------------------------------------------|------------------------------------|------|------|------|------|-------|
|               |            |                                          | 2014                               | 2015 | 2016 | 2017 | 2018 |       |
| Luzon         | Tuguegarao | Cagayan Valley Medical Center            | 15                                 | 612  | 25   | 88   | 488  | 1228  |
| Luzon         | Baguio     | Baguio General Hospital                  | 49                                 | 466  | 168  | 136  | 194  | 1013  |
|               |            | Pines City Doctors Hospital              | 1                                  | 2    | 127  | 0    | 0    | 130   |
| Luzon         | Naga       | Bicol Medical Center                     | 134                                | 75   | 87   | 321  | 87   | 704   |
| Metro Manila  | Manila     | San Lazaro Hospital                      | 91                                 | 272  | 200  | 218  | 215  | 996   |
| Metro Manila  | Valenzuela | Valenzuela Medical Center                | 57                                 | 69   | 2    | 1    | 6    | 135   |
|               |            | Valenzuela City General Hospital         | 28                                 | 96   | 38   | 63   | 42   | 267   |
| Metro Manila  | Quezon     | Quirino Memorial Hospital                | 80                                 | 98   | 58   | 404  | 798  | 1438  |
|               |            | Quirino Community Hospital               | 16                                 | 35   | 0    | 10   | 0    | 61    |
| Metro Manila  | Muntinlupa | ospital ng muntinlupa                    | 21                                 | 57   | 20   | 36   | 30   | 164   |
|               |            | Research Institute for Tropical Medicine | 40                                 | 2    | 65   | 30   | 8    | 145   |
| Visayas       | Iloilo     | Western Visayas Medical Center           | 65                                 | 122  | 176  | 23   | 59   | 445   |
| Visayas       | Tacloban   | Eastern Visayas Regional Medical Center  | 75                                 | 82   | 337  | 292  | 115  | 901   |
| Mindanao      | Surigao    | CARAGA Regional Hosptial                 | 447                                | 386  | 358  | 111  | 221  | 1523  |
|               |            | Surigao Medical Center                   | 0                                  | 85   | 31   | 0    | 0    | 116   |
| Mindanao      | Zamboanga  | Zamboanga City Medical Center            | 66                                 | 52   | 153  | 63   | 102  | 436   |
| Mindanao      | Cotabato   | Cotabato Regional and Medical Center     | 175                                | 201  | 229  | 68   | 197  | 870   |
| Mindanao      | Davao      | Southern Philippines Medical Center      | 135                                | 252  | 258  | 247  | 243  | 1135  |
|               |            | Davao Doctors Hospital                   | 53                                 | 0    | 146  | 0    | 0    | 199   |
| <b>Total</b>  |            |                                          | 1548                               | 2964 | 2478 | 2111 | 2805 | 11906 |
