# Supplementary material for: Estimating the annual dengue force of infection from the age of reporting primary infections across urban centres in endemic countries
Source: Springer Nature journal article supplement (doi:10.1186/s12916-021-02101-6), 2021-09-30
Supplement: MOESM3 [file 19716248]

### S3 File: Methods used to determine primary and post-primary dengue immune status

The primary and post-primary immune status of the sampled reporting dengue population with laboratory data was categorised according to a previous developed algorithm. Suspected dengue patients either PCR positive or with IgM panbio units  $\geq 9.9$  were classified as active dengue infections, while patients PCR negative and with IgM panbio units  $< 9.9$  were considered non-active dengue infections. Among active dengue infections, those on disease day 1 or 2 with IgG panbio units above and below 2.2 were categorised as post-primary and primary, respectively. Active cases on disease 3-5, with IgG:IgM ratios above and below 0.45 were classified as post-primary and primary, respectively. Non-active dengue infections were further classified as historical or negative for dengue if they had IgG panbio units above and below 2.2 panbio units, respectively. Post-primary dengue infections include infections with at least one previous flaviviral infection:

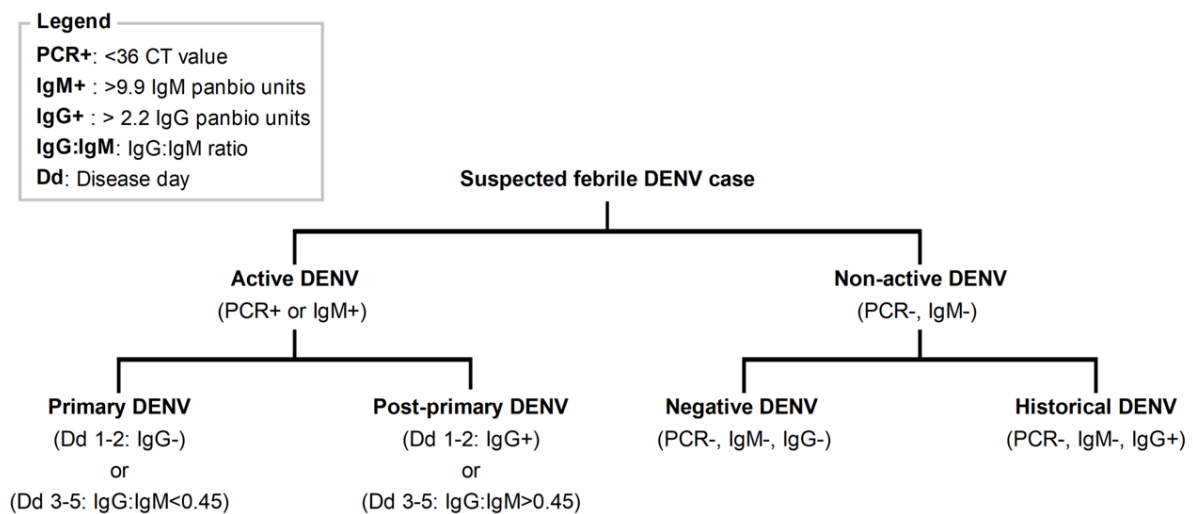

**Source:** Biggs JR, Sy AK, Brady OJ, *et al.* A serological framework to investigate acute primary and post-primary dengue cases reporting across the Philippines. *BMC Med* 2020; **18**: 364.
