# Supplementary material for: Estimating the annual dengue force of infection from the age of reporting primary infections across urban centres in endemic countries
Source: Springer Nature journal article supplement (doi:10.1186/s12916-021-02101-6), 2021-09-30
Supplement: MOESM4 [file 19716248]

#### S4 File: City-aggregated dengue incidence estimates

City/study period-aggregated all age and age-stratified dengue incidence per annum per 1000 population. Case reports include those who resided and reported in the same city. Incidence equates to total number of cases divided by person years at risk ( mean population multiplied by 4 years) multiplied by 1000:

All age dengue incidence:

| City       | DENV case reports (n) |      |      |      |       | Population <sup>a</sup> (N) |         |          |          |          | Incidence pa 1k |             |
|------------|-----------------------|------|------|------|-------|-----------------------------|---------|----------|----------|----------|-----------------|-------------|
|            | 2014                  | 2015 | 2016 | 2017 | Total | 2014*                       | 2015    | 2016*    | 2017*    | Mean     | Rate            | [95%CI]     |
| Baguio     | 345                   | 1647 | 2723 | 512  | 5227  | 340047.4                    | 345366  | 350684.6 | 356085.2 | 348045.8 | 3.75            | [3.65-3.86] |
| Cotabato   | 492                   | 233  | 858  | 201  | 1784  | 293868.5                    | 299438  | 305007.5 | 310680.7 | 302248.7 | 1.48            | [1.41-1.54] |
| Davao      | 5578                  | 2140 | 5555 | 1822 | 15095 | 1595432                     | 1632991 | 1670550  | 1708972  | 1651986  | 2.28            | [2.25-2.32] |
| Iloilo     | 1216                  | 606  | 1831 | 459  | 4112  | 443377.7                    | 447992  | 452606.3 | 457268.2 | 450311   | 2.28            | [2.21-2.35] |
| Manila     | 1157                  | 3075 | 2349 | 2122 | 8703  | 1754692                     | 1780148 | 1805604  | 1831424  | 1792967  | 1.21            | [1.19-1.24] |
| Muntinlupa | 340                   | 1153 | 286  | 331  | 2110  | 495528.7                    | 504509  | 513489.3 | 522629.4 | 509039.1 | 1.04            | [0.99-1.08] |
| Naga       | 288                   | 499  | 341  | 1097 | 2225  | 191710.5                    | 196003  | 200295.5 | 204681.9 | 198172.7 | 2.81            | [2.69-2.92] |
| Quezon     | 1260                  | 7163 | 3815 | 8716 | 20954 | 2901763                     | 2936116 | 2970469  | 3005223  | 2953393  | 1.77            | [1.75-1.80] |
| Surigao    | 788                   | 510  | 918  | 263  | 2479  | 151408.8                    | 154137  | 156865.2 | 159641.7 | 155513.2 | 3.99            | [3.83-4.14] |
| Tacloban   | 913                   | 379  | 106  | 772  | 2170  | 237876.7                    | 242089  | 246301.3 | 250587   | 244213.5 | 2.22            | [2.13-2.31] |
| Tuguegarao | 218                   | 1292 | 126  | 568  | 2204  | 150539.4                    | 153502  | 156464.6 | 159484.4 | 154997.6 | 3.55            | [3.41-3.70] |
| Valenzuela | 225                   | 358  | 276  | 370  | 1229  | 611425.9                    | 620422  | 629418.1 | 638544.7 | 624952.7 | 0.49            | [0.46-0.52] |
| Zamboanga  | 3837                  | 2671 | 2990 | 2253 | 11751 | 850940.3                    | 861799  | 872657.7 | 883653.2 | 867262.5 | 3.39            | [3.33-3.45] |

Under 5 years dengue incidence:

| City       | DENV case reports (n) |      |      |      |       | Population <sup>a</sup> (N) |        |          |          |          | Incidence pa 1k |             |
|------------|-----------------------|------|------|------|-------|-----------------------------|--------|----------|----------|----------|-----------------|-------------|
|            | 2014                  | 2015 | 2016 | 2017 | Total | 2014*                       | 2015   | 2016*    | 2017*    | Mean     | Rate            | [95%CI]     |
| Baguio     | 8                     | 38   | 91   | 18   | 155   | 36791.55                    | 37367  | 37942.45 | 38526.77 | 37656.94 | 1.03            | [0.87-1.19] |
| Cotabato   | 54                    | 34   | 104  | 30   | 222   | 33624.73                    | 34262  | 34899.27 | 35548.4  | 34583.6  | 1.60            | [1.39-1.82] |
| Davao      | 586                   | 267  | 635  | 213  | 1701  | 164507.3                    | 168380 | 172252.7 | 176214.6 | 170338.6 | 2.50            | [2.38-2.62] |
| Iloilo     | 102                   | 90   | 163  | 74   | 429   | 41513.96                    | 41946  | 42378.04 | 42814.54 | 42163.13 | 2.54            | [2.30-2.78] |
| Manila     | 95                    | 208  | 199  | 169  | 671   | 183986.8                    | 186656 | 189325.2 | 192032.5 | 188000.1 | 0.89            | [0.82-0.96] |
| Muntinlupa | 23                    | 75   | 32   | 30   | 160   | 43900.41                    | 44696  | 45491.59 | 46301.34 | 45097.33 | 0.89            | [0.75-1.02] |
| Naga       | 14                    | 16   | 18   | 80   | 128   | 19047.52                    | 19474  | 19900.48 | 20336.3  | 19689.58 | 1.63            | [1.34-1.91] |
| Quezon     | 130                   | 724  | 555  | 1222 | 2631  | 257278.2                    | 260324 | 263369.8 | 266451.2 | 261855.8 | 2.51            | [2.42-2.61] |
| Surigao    | 71                    | 53   | 103  | 44   | 271   | 15691.26                    | 15974  | 16256.74 | 16544.48 | 16116.62 | 4.20            | [3.70-4.70] |
| Tacloban   | 94                    | 79   | 12   | 205  | 390   | 25965.21                    | 26425  | 26884.8  | 27352.59 | 26656.9  | 3.66            | [3.29-4.02] |
| Tuguegarao | 31                    | 144  | 19   | 83   | 277   | 13202.18                    | 13462  | 13721.82 | 13986.65 | 13593.16 | 5.09            | [4.49-5.69] |
| Valenzuela | 26                    | 17   | 20   | 30   | 93    | 55110.15                    | 55921  | 56731.85 | 57554.47 | 56329.37 | 0.41            | [0.33-0.50] |
| Zamboanga  | 416                   | 264  | 317  | 319  | 1316  | 94778.55                    | 95988  | 97197.45 | 98422.14 | 96596.53 | 3.41            | [3.22-3.59] |

Under 10 years dengue incidence:

| City       | DENV case reports (n) |      |      |      |       | Population <sup>a</sup> (N) |        |          |          |          | Incidence pa 1k |             |
|------------|-----------------------|------|------|------|-------|-----------------------------|--------|----------|----------|----------|-----------------|-------------|
|            | 2014                  | 2015 | 2016 | 2017 | Total | 2014*                       | 2015   | 2016*    | 2017*    | Mean     | Rate            | [95%CI]     |
| Baguio     | 52                    | 151  | 324  | 62   | 589   | 70846.89                    | 71955  | 73063.11 | 74188.28 | 72513.32 | 2.03            | [1.87-2.19] |
| Cotabato   | 193                   | 89   | 422  | 91   | 795   | 68268.15                    | 69562  | 70855.85 | 72173.77 | 70214.94 | 2.83            | [2.63-3.03] |
| Davao      | 2002                  | 838  | 2355 | 752  | 5947  | 327082                      | 334782 | 342482   | 350359.1 | 338676.3 | 4.39            | [4.28-4.50] |
| Iloilo     | 512                   | 263  | 711  | 239  | 1725  | 80339.89                    | 81176  | 82012.11 | 82856.84 | 81596.21 | 5.29            | [5.04-5.53] |
| Manila     | 341                   | 869  | 803  | 747  | 2760  | 345920.6                    | 350939 | 355957.4 | 361047.6 | 353466.2 | 1.95            | [1.88-2.02] |
| Muntinlupa | 83                    | 333  | 100  | 125  | 641   | 86201.8                     | 87764  | 89326.2  | 90916.21 | 88552.05 | 1.81            | [1.67-1.95] |
| Naga       | 34                    | 81   | 60   | 343  | 518   | 38849.15                    | 39719  | 40588.85 | 41477.74 | 40158.69 | 3.22            | [2.95-3.50] |
| Quezon     | 516                   | 2719 | 1857 | 4261 | 9353  | 513667.9                    | 519749 | 525830.1 | 531982.3 | 522807.3 | 4.47            | [4.38-4.56] |
| Surigao    | 281                   | 175  | 341  | 119  | 916   | 31080.95                    | 31641  | 32201.05 | 32771    | 31923.5  | 7.17            | [6.71-7.64] |
| Tacloban   | 327                   | 208  | 42   | 523  | 1100  | 50248.2                     | 51138  | 52027.8  | 52933.08 | 51586.77 | 5.33            | [5.02-5.65] |
| Tuguegarao | 76                    | 470  | 55   | 299  | 900   | 26213.13                    | 26729  | 27244.87 | 27770.7  | 26989.42 | 8.34            | [7.79-8.88] |
| Valenzuela | 76                    | 117  | 88   | 109  | 390   | 113194.5                    | 114860 | 116525.5 | 118215.1 | 115698.8 | 0.84            | [0.76-0.93] |
| Zamboanga  | 1441                  | 959  | 1238 | 1033 | 4671  | 186879.3                    | 189264 | 191648.7 | 194063.5 | 190463.9 | 6.13            | [5.96-6.31] |

a: Population according to 2015 Philippine census

\*: Estimated population according to city-specific annual growth rates between 2010 & 2015.
