# Supplementary material for: Estimating the annual dengue force of infection from the age of reporting primary infections across urban centres in endemic countries
Source: Springer Nature journal article supplement (doi:10.1186/s12916-021-02101-6), 2021-09-30

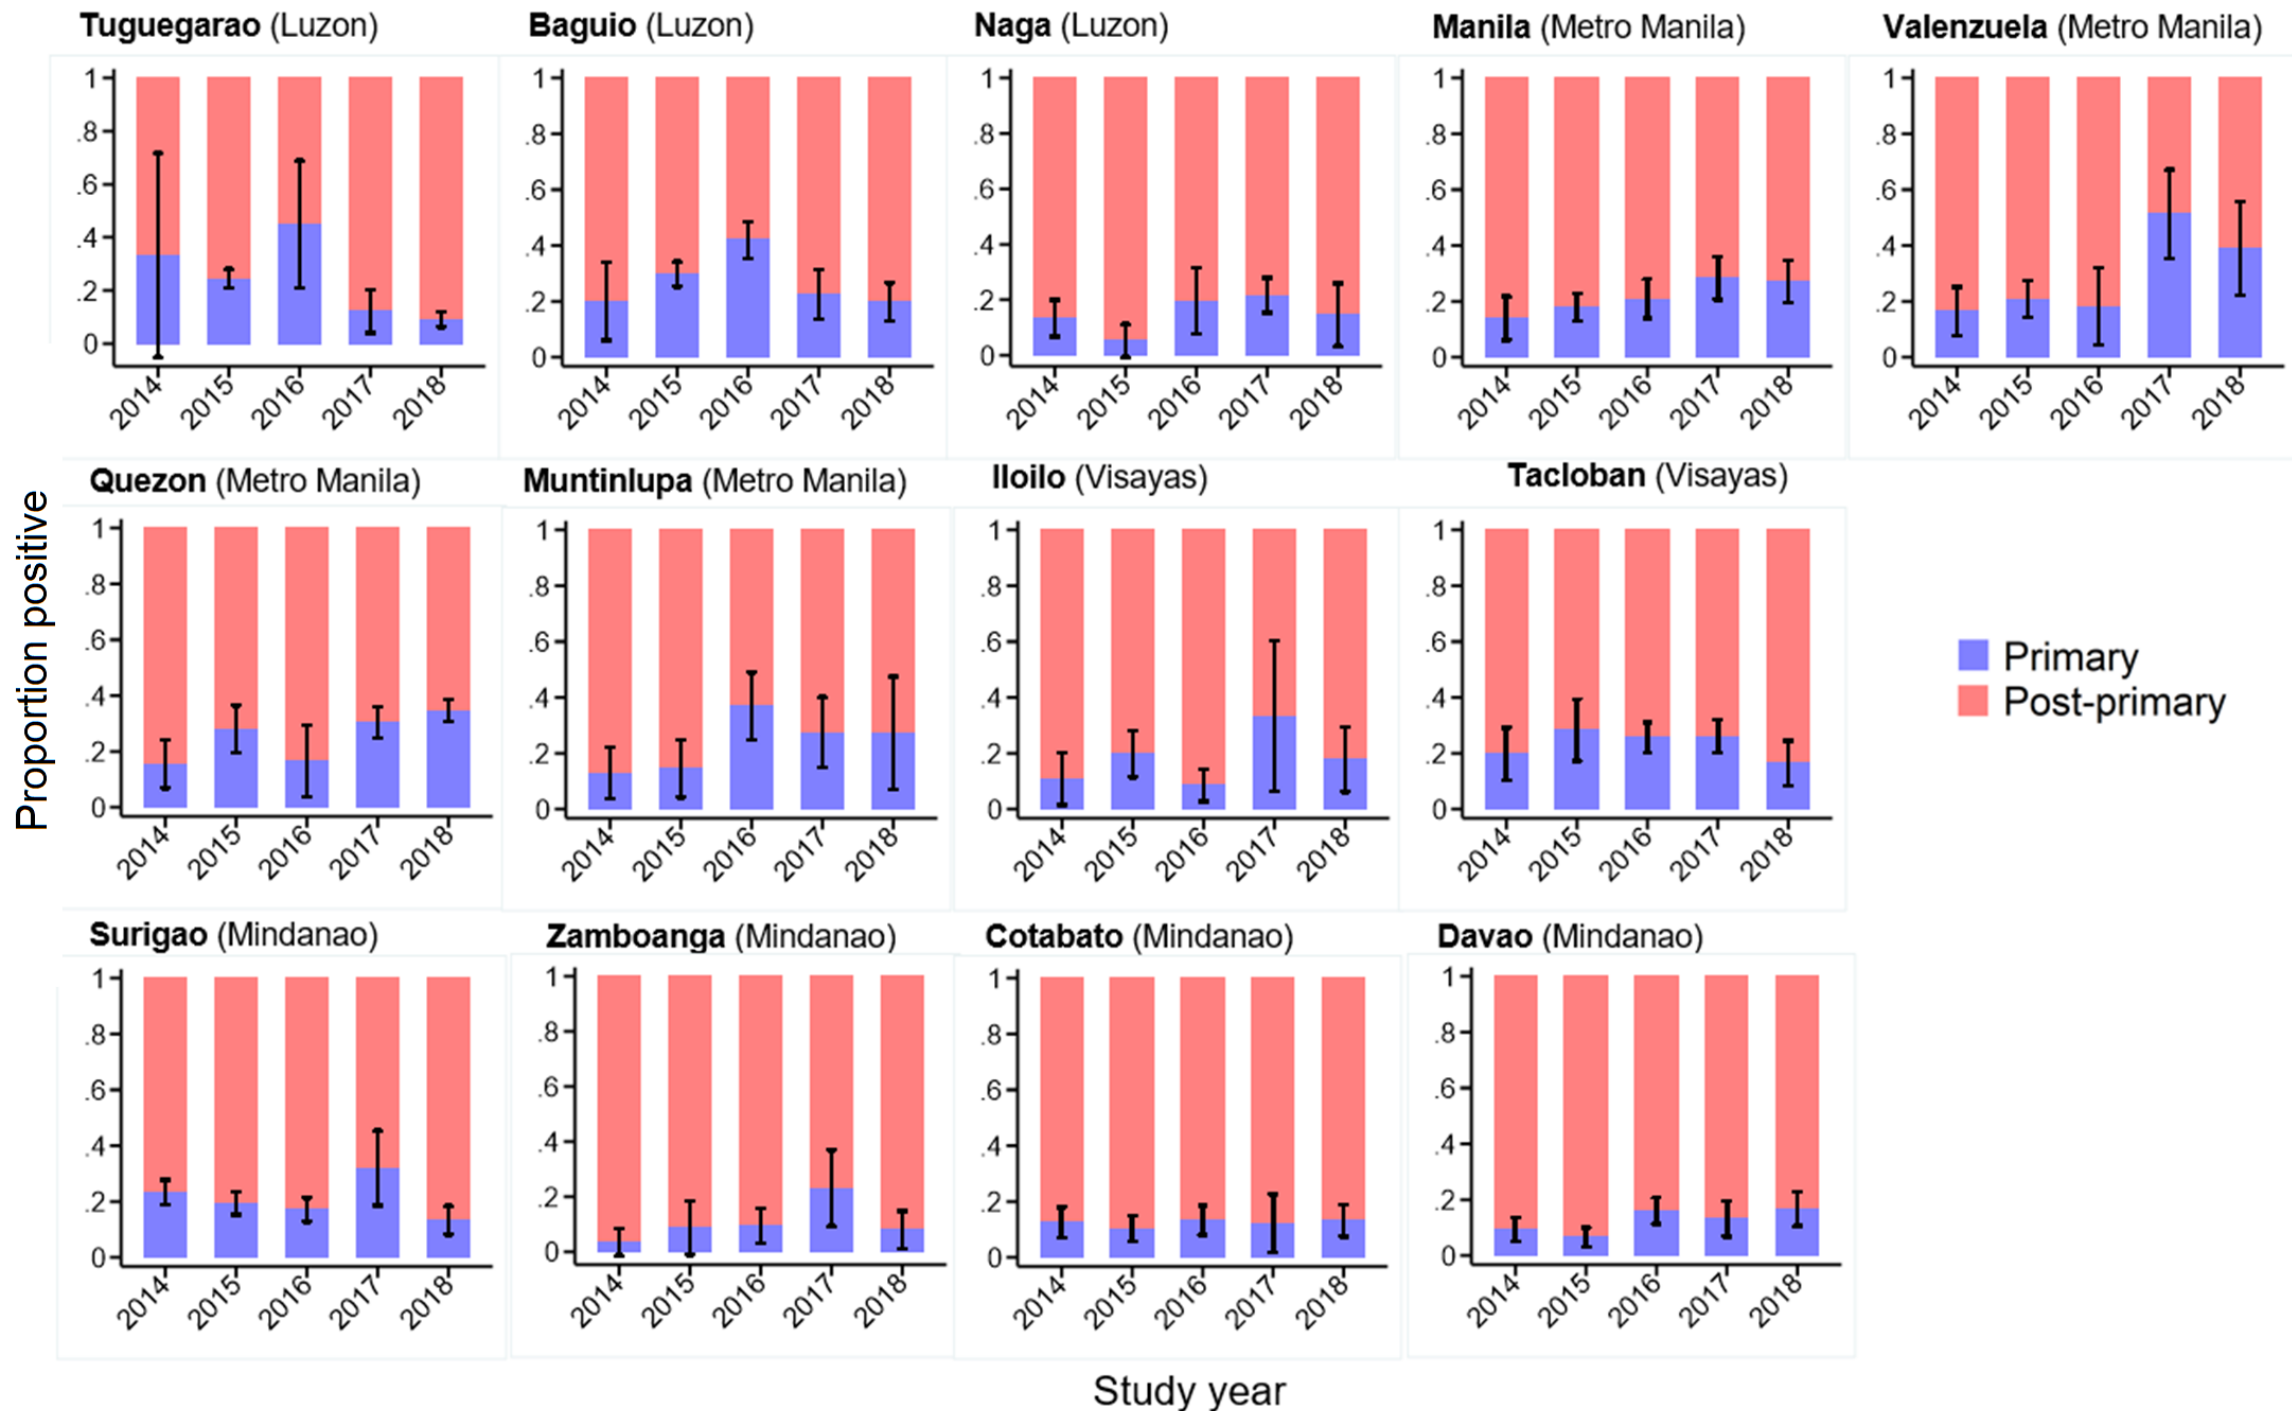

Supplement: MOESM5 [file 19716248]
