# Supplementary material for: Estimating the annual dengue force of infection from the age of reporting primary infections across urban centres in endemic countries
Source: Springer Nature journal article supplement (doi:10.1186/s12916-021-02101-6), 2021-09-30
Supplement: MOESM6 [file 19716248]

| City       | Simple catalytic model |                   |        | Reverse catalytic model |                   |        |                    |               |
|------------|------------------------|-------------------|--------|-------------------------|-------------------|--------|--------------------|---------------|
|            | SCR                    | [95%CI]           | AIC    | SCR                     | [95%CI]           | SRR    | [95%CI]            | AIC           |
| Baguio     | 0.033                  | [ 0.027 - 0.04 ]  | 268.83 | 0.054                   | [ 0.035 - 0.081 ] | 0.018  | [ 0.007 - 0.048 ]  | <b>244.30</b> |
| Cotabato   | 0.078                  | [ 0.061 - 0.101 ] | 144.35 | 0.164                   | [ 0.126 - 0.203 ] | 0.030  | [ 0.009 - 0.056 ]  | <b>127.51</b> |
| Davao      | 0.105                  | [ 0.08 - 0.14 ]   | 131.96 | 0.178                   | [ 0.144 - 0.198 ] | 0.017  | [ 0.005 - 0.035 ]  | <b>111.40</b> |
| Iloilo     | 0.121                  | [ 0.087 - 0.168 ] | 80.31  | 0.130                   | [ 0.096 - 0.175 ] | <0.001 | [ 0.000 - <0.001 ] | <b>78.32</b>  |
| Manila     | 0.119                  | [ 0.095 - 0.148 ] | 171.75 | 0.168                   | [ 0.154 - 0.187 ] | 0.022  | [ 0.006 - 0.039 ]  | <b>164.42</b> |
| Muntinlupa | 0.074                  | [ 0.058 - 0.094 ] | 159.38 | 0.133                   | [ 0.094 - 0.196 ] | 0.032  | [ 0.009 - 0.062 ]  | <b>144.05</b> |
| Naga       | 0.063                  | [ 0.042 - 0.094 ] | 129.39 | 0.063                   | [ 0.042 - 0.095 ] | <0.001 | [ 0.000 - <0.001 ] | <b>112.41</b> |
| Quezon     | 0.262                  | [ 0.238 - 0.288 ] | 303.29 | 0.249                   | [ 0.223 - 0.279 ] | <0.001 | [ 0.000 - <0.001 ] | <b>291.09</b> |
| Surigao    | 0.079                  | [ 0.067 - 0.093 ] | 269.10 | 0.100                   | [ 0.079 - 0.126 ] | 0.006  | [ 0.002 - 0.011 ]  | <b>251.00</b> |
| Tacloban   | 0.092                  | [ 0.071 - 0.119 ] | 168.12 | 0.121                   | [ 0.075 - 0.193 ] | 0.018  | [ 0.002 - 0.047 ]  | <b>155.25</b> |
| Tuguegarao | 0.064                  | [ 0.055 - 0.075 ] | 142.35 | 0.067                   | [ 0.042 - 0.100 ] | 0.021  | [ 0.004 - 0.056 ]  | <b>115.11</b> |
| Valenzuela | 0.121                  | [ 0.08 - 0.182 ]  | 133.84 | 0.175                   | [ 0.141 - 0.214 ] | 0.029  | [ 0.002 - 0.063 ]  | <b>118.66</b> |
| Zamboanga  | 0.082                  | [ 0.066 - 0.102 ] | 214.52 | 0.112                   | [ 0.051 - 0.176 ] | 0.061  | [ 0.022 - 0.112 ]  | <b>180.43</b> |
