# Supplementary material for: Estimating the annual dengue force of infection from the age of reporting primary infections across urban centres in endemic countries
Source: Springer Nature journal article supplement (doi:10.1186/s12916-021-02101-6), 2021-09-30
Supplement: MOESM8 [file 19716248]

| City       | Mean primary DENV age (years) |             |      |             |      |             |      |             |      |             |         |             |
|------------|-------------------------------|-------------|------|-------------|------|-------------|------|-------------|------|-------------|---------|-------------|
|            | 2014                          |             | 2015 |             | 2016 |             | 2017 |             | 2018 |             | 2014-18 |             |
|            | Mean                          | [95%CI]     | Mean | [95%CI]     | Mean | [95%CI]     | Mean | [95%CI]     | Mean | [95%CI]     | Mean    | [95%CI]     |
| Baguio     | 26.6                          | [22.1-31.1] | 25.2 | [23.1-27.2] | 24.8 | [22.5-27.2] | 21.9 | [18.6-25.1] | 16.9 | [13.7-20.2] | 21.0    | [19.4-22.6] |
| Cotabato   | 17.1                          | [13.3-20.8] | 12.2 | [9.3-15.1]  | 6.8  | [4.7-8.8]   | 13.0 | [10.1-15.9] | 9.4  | [6.7-12.0]  | 11.2    | [9.1-13.3]  |
| Davao      | 10.8                          | [8.4-13.1]  | 10.8 | [8.1-13.5]  | 9.3  | [7.1-11.6]  | 8.3  | [5.7-10.9]  | 10.3 | [8.1-12.5]  | 9.8     | [8.2-11.4]  |
| Iloilo     | 9.0                           | [5.7-12.3]  | 9.8  | [7.6-11.9]  | 8.5  | [6.1-10.9]  | 12.2 | [8.7-15.7]  | 18.3 | [14.0-22.5] | 11.3    | [9.1-13.4]  |
| Manila     | 8.2                           | [5.6-10.8]  | 7.0  | [5.3-8.7]   | 11.0 | [8.8-13.2]  | 10.8 | [8.8-12.8]  | 13.2 | [11.1-15.4] | 10.2    | [8.8-11.7]  |
| Muntinlupa | 12.7                          | [9.6-15.9]  | 8.1  | [5.5-10.8]  | 9.2  | [6.5-12.0]  | 16.9 | [13.3-20.4] | 13.5 | [10.5-16.5] | 13.0    | [11.4-14.5] |
| Naga       | 22.2                          | [17.9-26.5] | 11.3 | [7.5-15.0]  | 9.2  | [6.0-12.3]  | 12.6 | [10.0-15.2] | 13.8 | [11.0-16.7] | 13.6    | [11.4-15.8] |
| Quezon     | 9.6                           | [7.2-12.1]  | 7.9  | [5.8-10.0]  | 8.6  | [5.0-12.2]  | 8.4  | [7.0-9.8]   | 8.2  | [7.0-9.3]   | 8.2     | [7.2-9.3]   |
| Surigao    | 13.2                          | [11.1-15.3] | 14.5 | [12.1-16.8] | 15.1 | [12.6-17.6] | 12.4 | [9.0-15.8]  | 18.4 | [15.5-21.3] | 14.4    | [12.7-16.1] |
| Tacloban   | 15.5                          | [12.0-19.0] | 10.9 | [7.7-14.1]  | 8.6  | [6.8-10.4]  | 8.9  | [7.0-10.9]  | 9.8  | [7.4-12.2]  | 10.8    | [9.2-12.4]  |
| Tuguegarao | 10.6                          | [6.2-14.9]  | 15.1 | [13.1-17.1] | 11.4 | [8.7-14.2]  | 12.5 | [9.6-15.4]  | 13.8 | [11.3-16.3] | 13.3    | [12.1-14.5] |
| Valenzuela | 10.8                          | [7.9-13.6]  | 11.3 | [9.2-13.5]  | 9.2  | [5.7-12.6]  | 11.9 | [9.6-14.2]  | 10.9 | [8.9-12.9]  | 11.2    | [9.5-12.8]  |
| Zamboanga  | 27.5                          | [26.1-28.9] | 13.7 | [8.5-18.8]  | 10.5 | [7.5-13.6]  | 9.0  | [6.0-12.0]  | 6.4  | [3.7-9.1]   | 13.8    | [11.6-16.0] |
