# Supplementary material for: Estimating the annual dengue force of infection from the age of reporting primary infections across urban centres in endemic countries
Source: Springer Nature journal article supplement (doi:10.1186/s12916-021-02101-6), 2021-09-30
Supplement: MOESM9 [file 19716248]

| City       | Mean age of dengue cases with warning signs (years) |             |      |             |      |             |      |             |      |             |         |             |
|------------|-----------------------------------------------------|-------------|------|-------------|------|-------------|------|-------------|------|-------------|---------|-------------|
|            | 2014                                                |             | 2015 |             | 2016 |             | 2017 |             | 2018 |             | 2014-18 |             |
|            | Mean                                                | [95%CI]     | Mean | [95%CI]     | Mean | [95%CI]     | Mean | [95%CI]     | Mean | [95%CI]     | Mean    | [95%CI]     |
| Tuguegarao | 11.0                                                | [7.1-14.9]  | 15.1 | [13.8-16.4] | 11.8 | [9.4-14.2]  | 11.1 | [9.2-13.0]  | 18.1 | [16.5-19.7] | 16.3    | [15.1-17.5] |
| Baguio     | 21.4                                                | [17.6-25.2] | 29.8 | [27.2-32.5] | 29.0 | [26.7-31.2] | 24.2 | [21.7-26.6] | 22.3 | [19.7-24.9] | 25.4    | [23.5-27.2] |
| Valenzuela | 12.9                                                | [11.2-14.7] | 11.5 | [10.1-12.9] | 15.2 | [12.9-17.6] | 12.6 | [10.9-14.3] | 15.1 | [12.7-17.5] | 12.7    | [11.4-14.0] |
| Quezon     | 12.6                                                | [10.5-14.7] | 10.7 | [9.1-12.4]  | 15.5 | [13.0-18.1] | 9.4  | [8.4-10.4]  | 9.5  | [8.6-10.5]  | 9.9     | [9.1-10.7]  |
| Manila     | 10.2                                                | [8.6-11.7]  | 10.8 | [9.6-12.0]  | 12.5 | [11.0-14.0] | 14.2 | [12.6-15.7] | 15.7 | [14.1-17.2] | 13.1    | [12.1-14.2] |
| Muntinlupa | 13.0                                                | [9.9-16.1]  | 16.4 | [13.6-19.1] | 12.2 | [10.1-14.4] | 14.5 | [12.4-16.7] | 14.8 | [12.0-17.7] | 13.9    | [12.2-15.6] |
| Naga       | 22.7                                                | [20.4-24.9] | 21.0 | [18.5-23.4] | 19.9 | [17.3-22.4] | 18.4 | [16.5-20.4] | 13.4 | [11.5-15.4] | 18.2    | [16.6-19.8] |
| Iloilo     | 9.9                                                 | [8.1-11.6]  | 10.6 | [9.2-12.0]  | 12.8 | [11.3-14.3] | 8.4  | [6.3-10.5]  | 15.8 | [13.5-18.1] | 12.4    | [11.1-13.6] |
| Tacloban   | 25.0                                                | [19.6-30.4] | 15.1 | [11.7-18.5] | 11.6 | [10.1-13.1] | 11.5 | [9.0-14.1]  | 12.5 | [10.0-15.0] | 11.9    | [10.4-13.3] |
| Surigao    | 12.5                                                | [10.5-14.5] | 18.8 | [15.3-22.3] | 12.3 | [8.4-16.1]  | 15.8 | [12.8-18.8] | 13.3 | [11.2-15.5] | 18.0    | [14.7-21.3] |
| Davao      | 12.7                                                | [11.0-14.3] | 14.8 | [13.0-16.6] | 14.0 | [12.5-15.4] | 16.1 | [14.3-18.0] | 11.9 | [10.5-13.2] | 14.8    | [13.6-16.0] |
| Cotabato   | 13.6                                                | [11.3-16.0] | 16.9 | [14.9-18.8] | 12.0 | [10.3-13.7] | 18.5 | [15.6-21.4] | 13.6 | [11.8-15.5] | 15.5    | [14.0-17.0] |
| Zamboanga  | 16.6                                                | [14.1-19.1] | 11.2 | [8.5-13.8]  | 12.4 | [10.8-14.0] | 10.3 | [8.7-11.9]  | 11.0 | [9.1-12.8]  | 11.8    | [10.4-13.1] |
